# Supplementary material for: Sulfonated-polypyrene aniline/polyaniline composite fortified with Cu-GQD@ZIF8 as an electrochemical enzymatic urea biosensor
Source: Royal Society of Chemistry journal article supplement (doi:10.1039/d4ay01397b), 2024-01-01
Supplement: d4ay01397b1.pdf [file d4ay01397b1.pdf]

## Supplementary Information

# Sulfonated-Polypyrene aniline/Polyaniline Composite Fortified with Cu-GQD@ZIF8 as the Electrochemical Enzymatic Urea Biosensor

Taşkın Çamurcu<sup>a</sup>, Vildan Şanko<sup>b,c</sup>, İpek Ömeroğlu<sup>a</sup>, Süreyya Oğuz Tümay<sup>d</sup>, Ahmet Şenocak<sup>a\*</sup>

<sup>a</sup>Department of Chemistry, Gebze Technical University, Gebze 41400, Kocaeli, Türkiye

<sup>b</sup>Department of Chemistry, Hacettepe University, Ankara 06800, Türkiye

<sup>c</sup>METU MEMS Center, Ankara, 06530, Türkiye

<sup>d</sup>Department of Chemistry, Atatürk University, Erzurum 25100, Türkiye

\*Corresponding author:

Dr. Ahmet Şenocak

Department of Chemistry, Gebze Technical University, P.O.Box: 141, Gebze 41400, Kocaeli,  
Türkiye

E-mail: [asenocak@gtu.edu.tr](mailto:asenocak@gtu.edu.tr)

Telephone: +902626503106

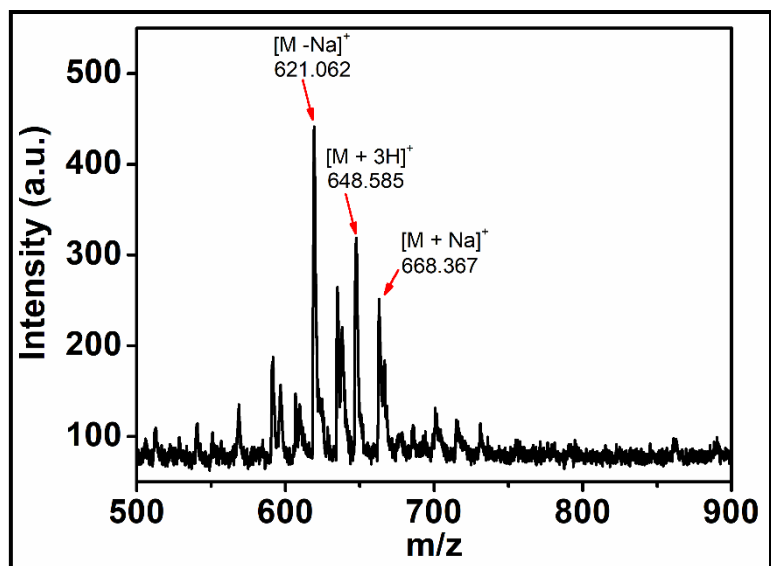

**Fig. S1.** The MALDI-TOF spectrum of compound 3 (Matrix: DHB).

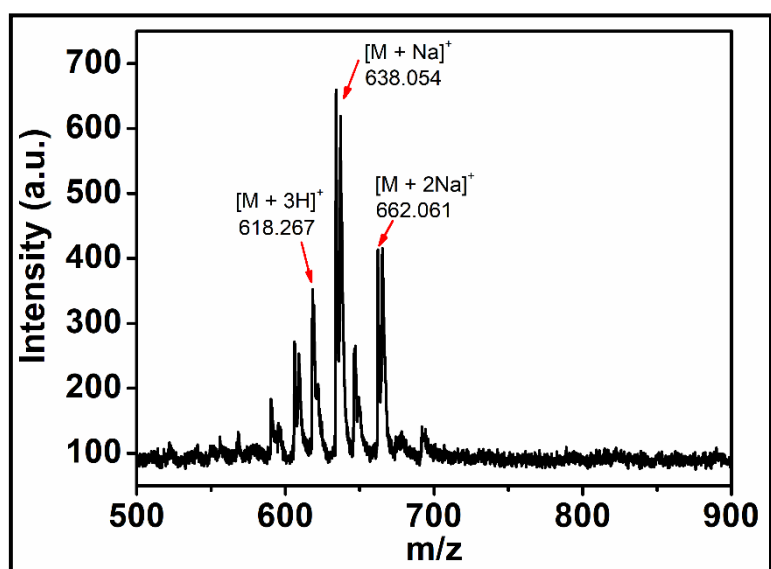

**Fig. S2.** The MALDI-TOF spectrum of compound 4 (No matrix).

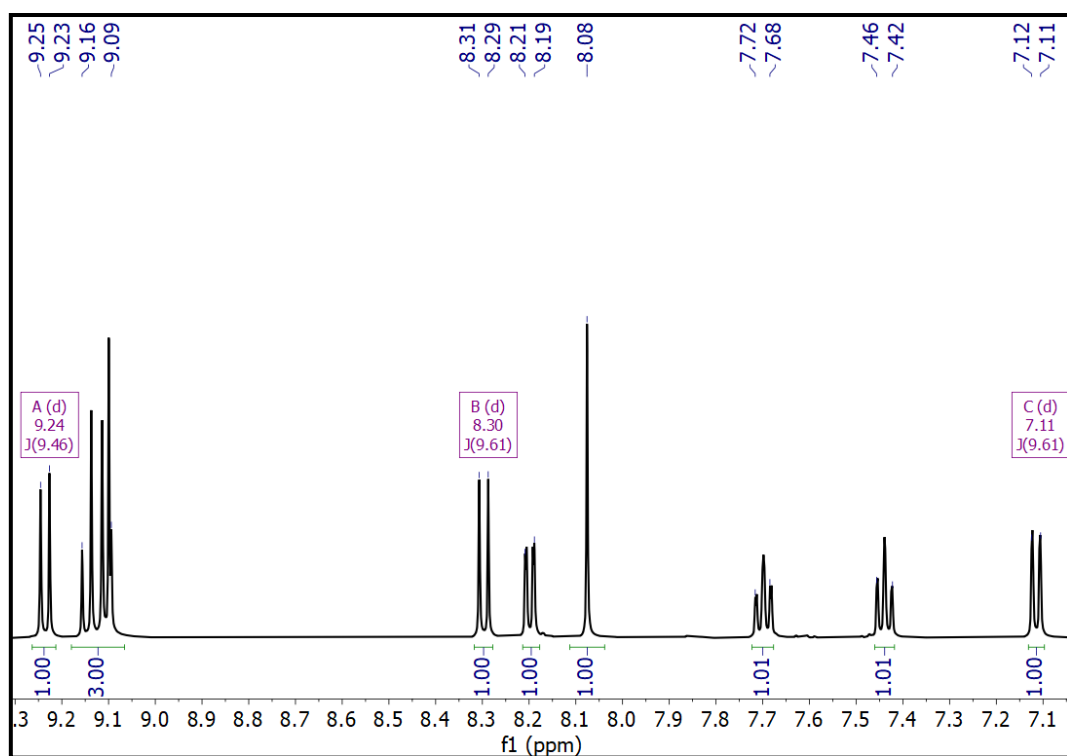

**Fig. S3.** The  $^1\text{H}$ -NMR spectrum of compound **3** in  $\text{DMSO-d}_6$ .

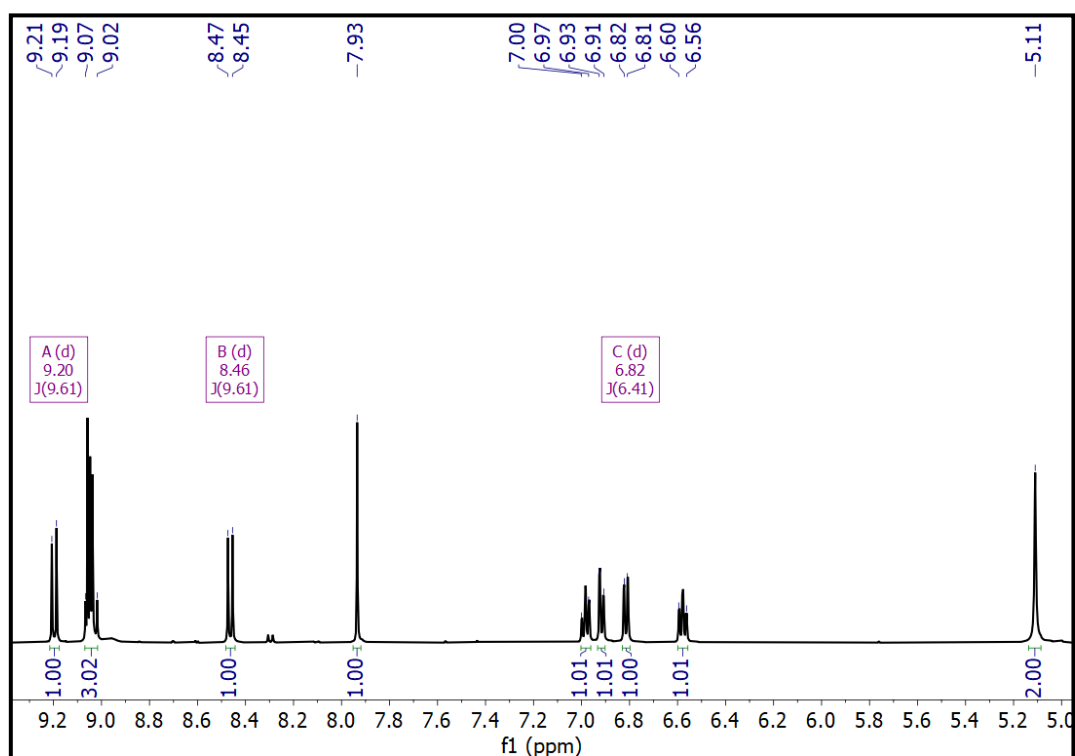

**Fig. S4.** The  $^1\text{H}$ -NMR spectrum of compound **4** in  $\text{DMSO-d}_6$ .

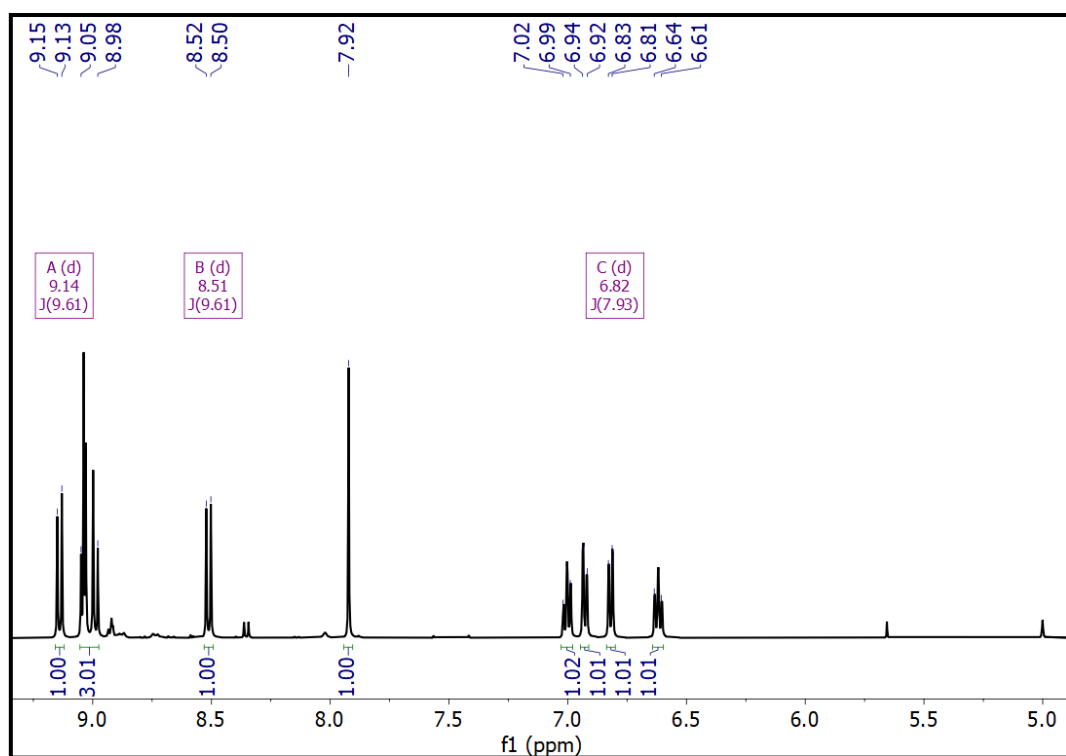

**Fig. S5.** The  $^1\text{H}$ -NMR spectrum of compound **4** in  $\text{DMSO-d}_6/\text{D}_2\text{O}$ .

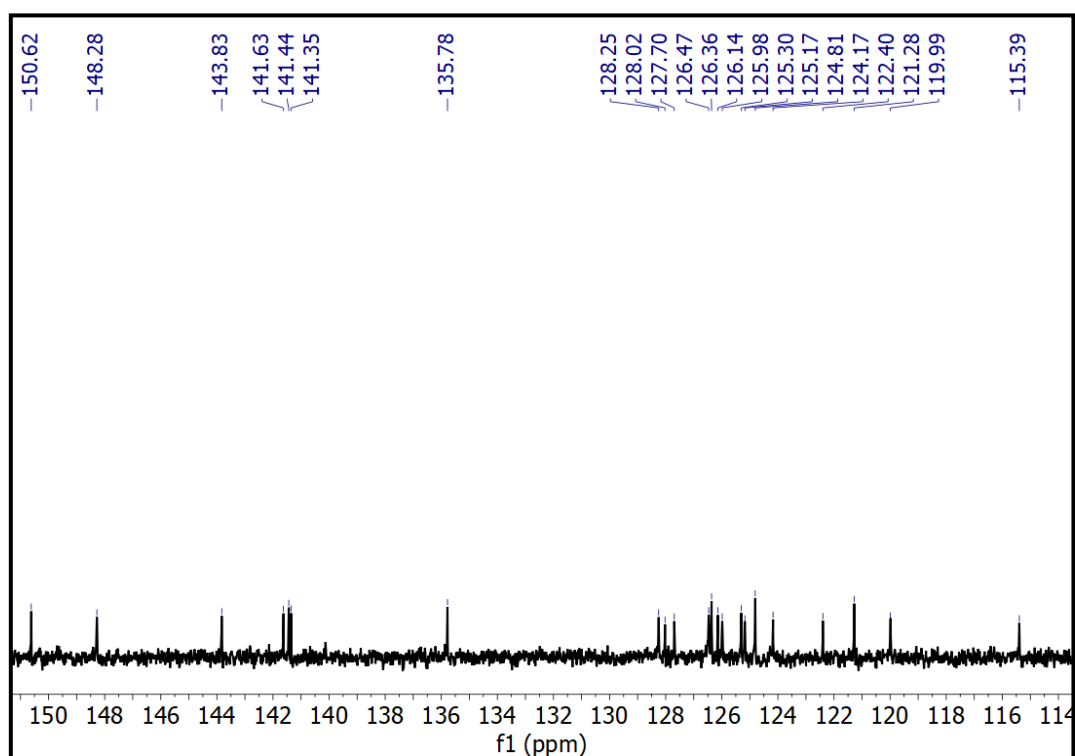

**Fig. S6.** The  $^{13}\text{C}$ -NMR spectrum of compound **3** in  $\text{DMSO-d}_6$ .

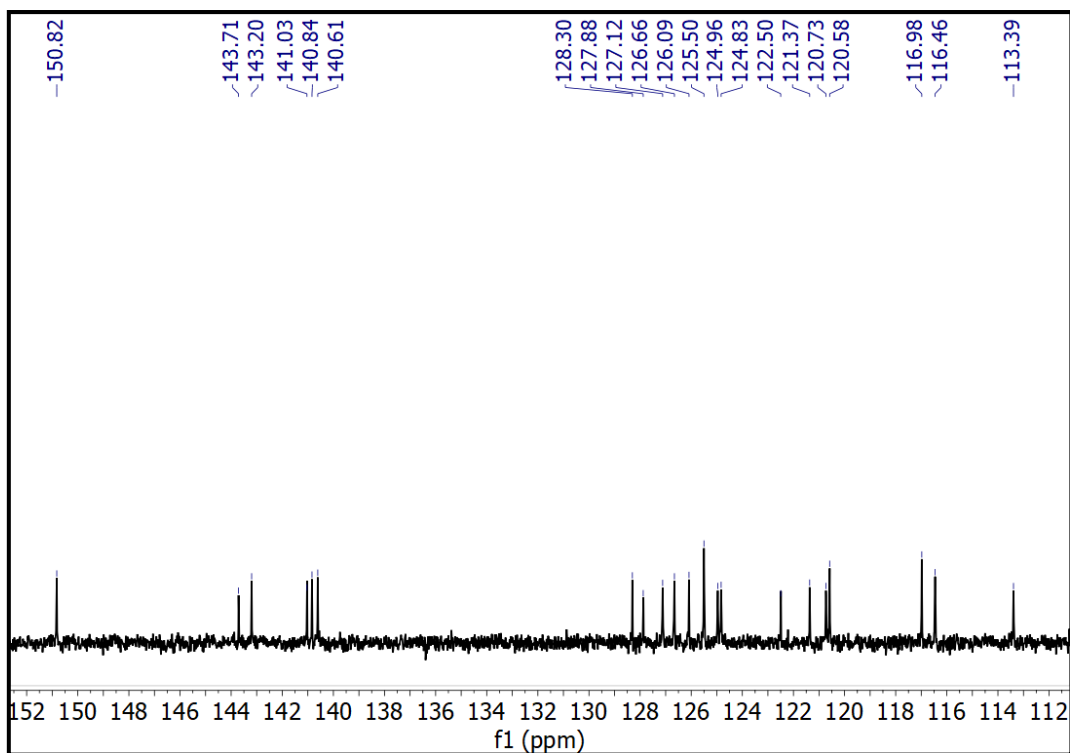

Fig. S7. The  $^{13}\text{C}$ -NMR spectrum of compound **4** in  $\text{DMSO-d}_6$ .

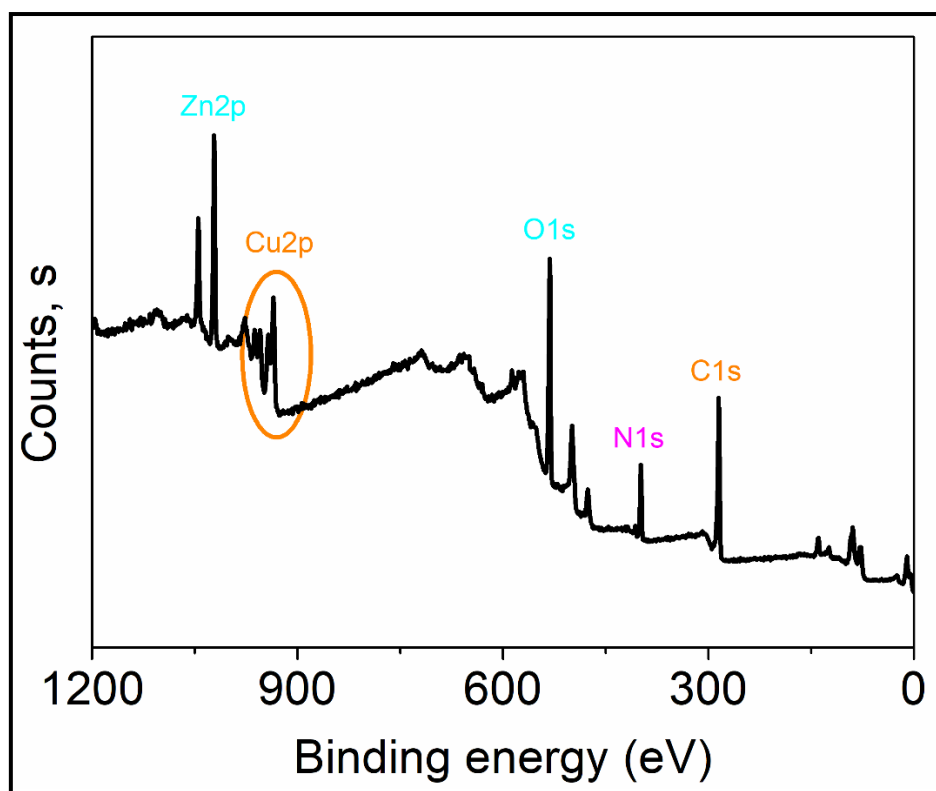

Fig. S8. XPS spectrum of Cu-GQD@ZIF8 materials.

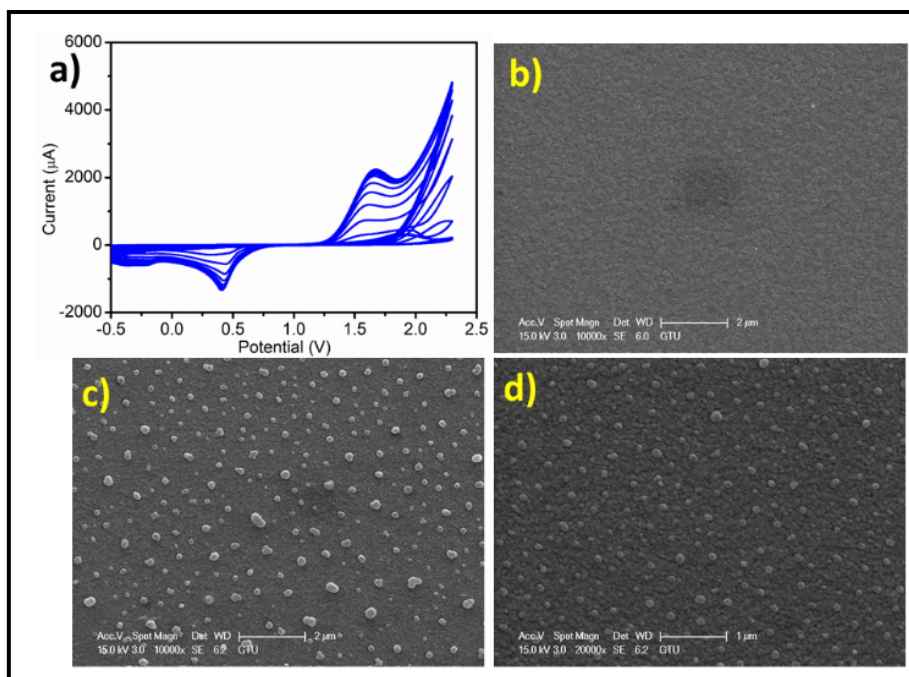

**Fig. S9.** a) Electropolymerization of pyranine aniline compound onto the ITO glass surface with 15 cycles using CV technique, b) SEM image of unmodified ITO glass, c-d) SEM images of electropolymerized PA compound.

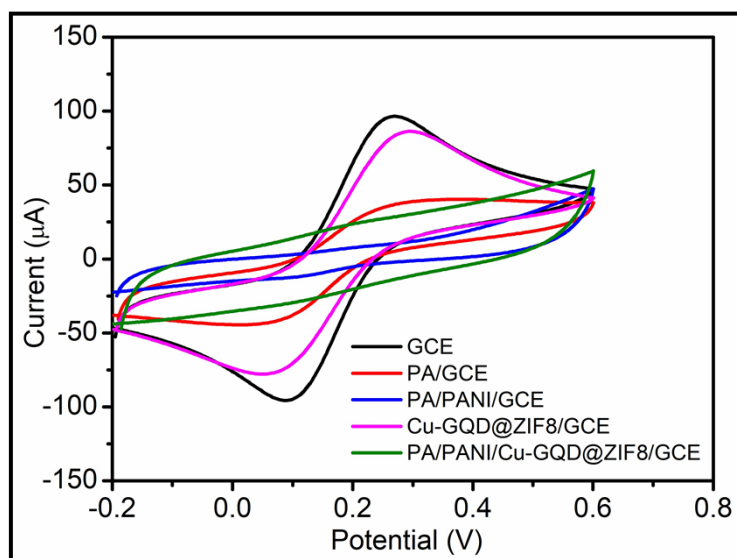

**Fig. S10.** CV voltammograms of bare GCE compared to PA, PANI, GQD@ZIF8, and PA/PANI/Cu-GQD@ZIF8/Urs/GCE carried out in 5.0 mM  $[\text{Fe}(\text{CN})_6]^{3-/-4-}$  a solution containing 0.1 M KCl.

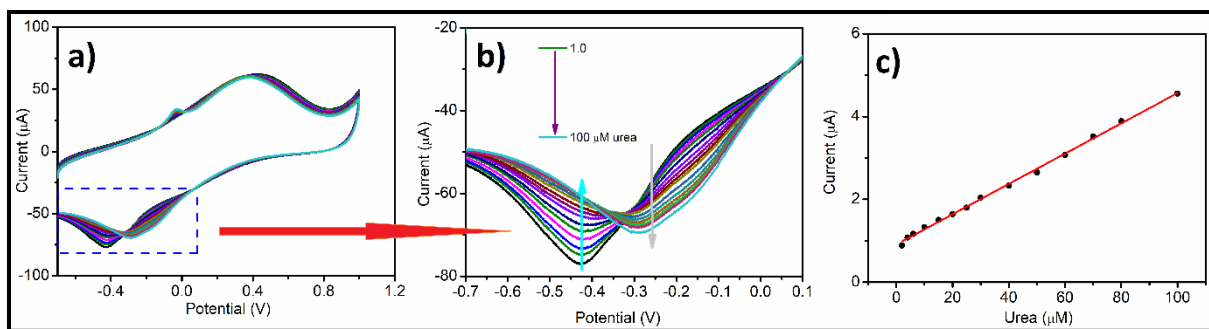

**Fig. S11.** a) CV responses for different urea concentrations on PA/PANI/Cu-GQD@ZIF8/Urs/GCE b) Close-up view of a plot (a) and c) linear relationship between urea concentrations and peak currents.

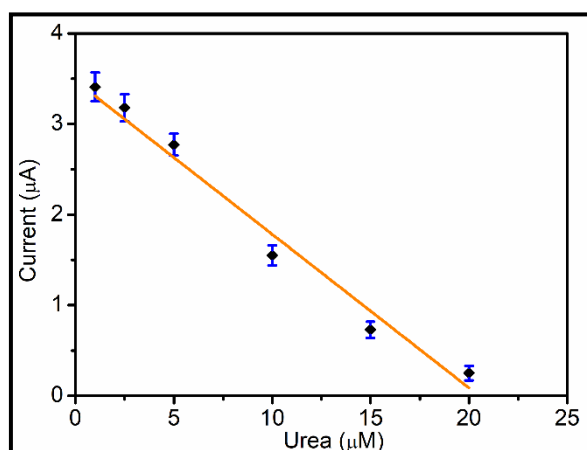

**Fig. S12.** Linear relationship between urea concentrations and peak currents by decreasing peaks on DPV measurement at -0.42V.

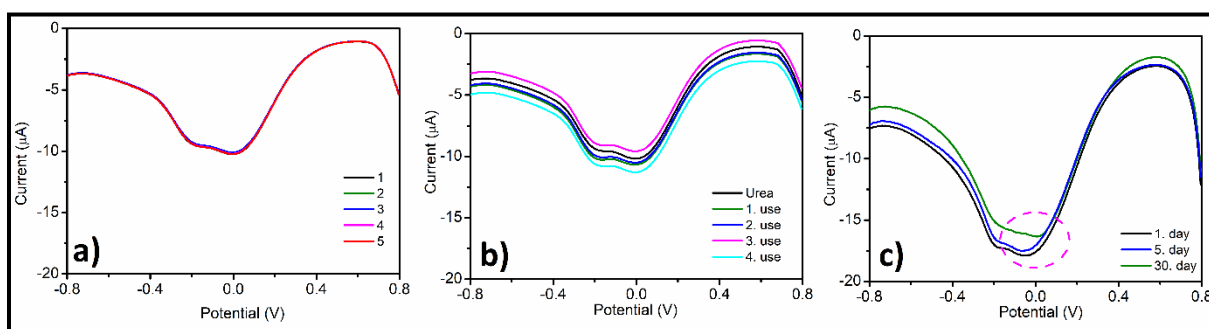

**Fig. S13.** a) Repeatability, b) reusability, and c) lifetime analyses of the PA/PANI/Cu-GQD@ZIF8 sensor.

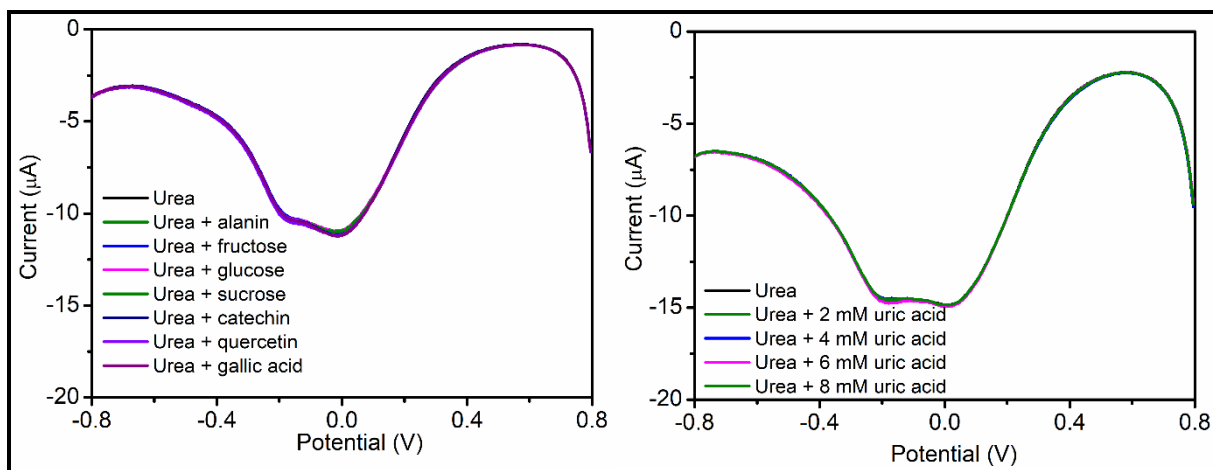

**Fig. S14.** The effect of (a) bioanalytes and (b) different concentrations of uric acid on the voltammetric response of PA/PANI/Cu-GQD@ZIF8/urease biosensor to urea.

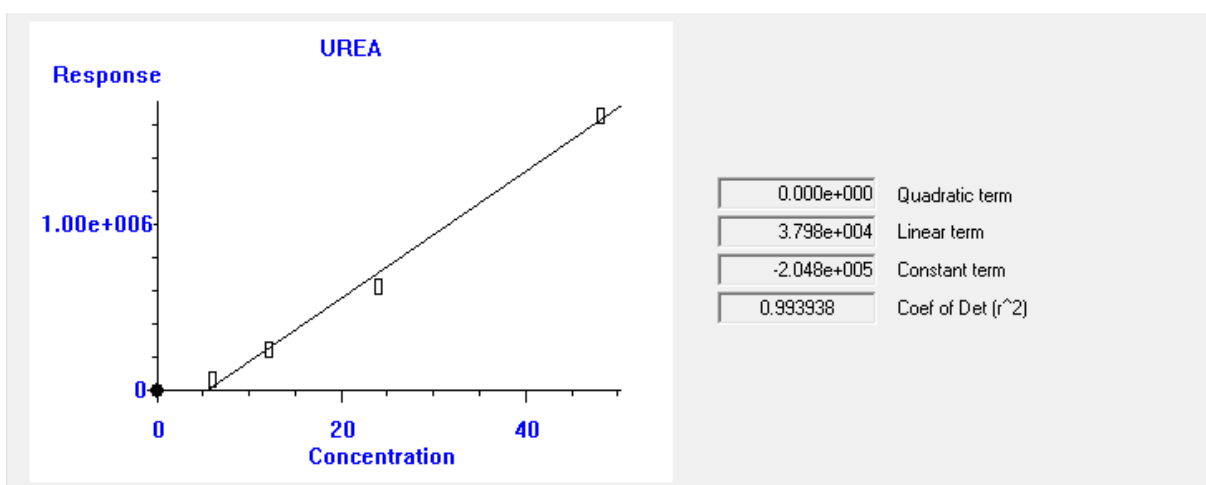

**Fig. S15.** GC-MS calibration curve for urea.



**Table S1:** Spike/recovery tests for electrochemical determination of urea in serum sample.

|       | Presented electrochemical method |                            |              | GC-MS                      |
|-------|----------------------------------|----------------------------|--------------|----------------------------|
|       | Added ( $\mu\text{M}$ )          | Detected ( $\mu\text{M}$ ) | Recovery (%) | Detected ( $\mu\text{M}$ ) |
| Serum | 0                                | -                          | -            | ND <sup>a</sup>            |
|       | 20.0                             | 19.62 $\pm$ 1.10           | 98.10        |                            |
|       | 40.0                             | 39.22 $\pm$ 1.64           | 98.05        |                            |

**a:** Not detected.
